# Supplementary material for: Genomic Analysis of Molecular Bacterial Mechanisms of Resistance to Phage Infection
Source: Frontiers journal article supplement (doi:10.3389/fmicb.2021.784949), 2022-02-17
Supplement: Table_4.XLS [file Table_4.XLS]

## Sheet: Ab33_GEIH-2010_MSMK01000003
##sequence-region MSMK01000003.1 1 13818
##species https://www.ncbi.nlm.nih.gov/Taxonomy/Browser/wwwtax.cgi?id=470
MSMK01000003.1	Protein Homology	CDS	114	1169	.	-	0	Rieske (2Fe-2S) protein
MSMK01000003.1	Protein Homology	CDS	1459	2619	.	-	0	carboxylate--amine ligase
MSMK01000003.1	Protein Homology	CDS	2641	3006	.	-	0	hypothetical protein
MSMK01000003.1	Protein Homology	CDS	3195	4151	.	-	0	hypothetical protein
MSMK01000003.1	Protein Homology	CDS	4471	5067	.	-	0	undecaprenyl-diphosphatase
MSMK01000003.1	Protein Homology	CDS	5203	6453	.	+	0	low temperature requirement protein A
MSMK01000003.1	Protein Homology	CDS	6523	7896	.	-	0	UDP-N-acetylmuramate:L-alanyl-gamma-D-glutamyl-meso-diaminopimelate ligase
MSMK01000003.1	Protein Homology	CDS	8136	8501	.	+	0	hypothetical protein
MSMK01000003.1	Protein Homology	CDS	8488	8700	.	-	0	hypothetical protein
MSMK01000003.1	Protein Homology	CDS	8685	9197	.	+	0	5-(carboxyamino)imidazole ribonucleotide mutase
MSMK01000003.1	Protein Homology	CDS	9207	10328	.	+	0	5-(carboxyamino)imidazole ribonucleotide synthase
MSMK01000003.1	Protein Homology	CDS	11016	12308	.	+	0	lytic transglycosylase
MSMK01000003.1	Protein Homology	CDS	12358	12732	.	-	0	hypothetical protein
MSMK01000003.1	Protein Homology	CDS	12846	13751	.	-	0	dual-action HEIGH metallo-peptidase

## Sheet: Ab33_GEIH-2010_MSMK01000187
##sequence-region MSMK01000187.1 1 25330
##species https://www.ncbi.nlm.nih.gov/Taxonomy/Browser/wwwtax.cgi?id=470
MSMK01000187.1	Protein Homology	CDS	1562	3238	.	-	0	arylsulfatase
MSMK01000187.1	Protein Homology	CDS	3409	4026	.	-	0	rhomboid family intramembrane serine protease
MSMK01000187.1	Protein Homology	CDS	4184	4822	.	+	0	Fe/S biogenesis protein NfuA
MSMK01000187.1	Protein Homology	CDS	4992	7256	.	+	0	BS436_07535
MSMK01000187.1	Protein Homology	CDS	7279	8286	.	-	0	hypothetical protein
MSMK01000187.1	Protein Homology	CDS	8313	9338	.	-	0	alpha/beta hydrolase
MSMK01000187.1	Protein Homology	CDS	9623	10237	.	+	0	carbonic anhydrase
MSMK01000187.1	Protein Homology	CDS	10270	10893	.	-	0	arylesterase
MSMK01000187.1	Protein Homology	CDS	10938	11630	.	+	0	ABC transporter ATP-binding protein
MSMK01000187.1	Protein Homology	CDS	11634	14093	.	+	0	ABC transporter permease
MSMK01000187.1	Protein Homology	CDS	14095	14904	.	-	0	rhomboid family intramembrane serine protease
MSMK01000187.1	Protein Homology	CDS	14981	15658	.	+	0	monofunctional biosynthetic peptidoglycan transglycosylase
MSMK01000187.1	Protein Homology	CDS	15763	17841	.	+	0	polyphosphate kinase 1
MSMK01000187.1	Protein Homology	CDS	18081	18671	.	+	0	cell division protein
MSMK01000187.1	Protein Homology	CDS	18701	19609	.	-	0	LysR family transcriptional regulator
MSMK01000187.1	Protein Homology	CDS	19616	20560	.	-	0	alpha/beta hydrolase
MSMK01000187.1	Protein Homology	CDS	20615	21796	.	-	0	FAD-dependent oxidoreductase
MSMK01000187.1	Protein Homology	CDS	21889	22053	.	-	0	rubredoxin
MSMK01000187.1	Protein Homology	CDS	22497	22934	.	+	0	ATPase
MSMK01000187.1	Protein Homology	CDS	23004	23492	.	-	0	esterase
MSMK01000187.1	Protein Homology	CDS	23749	25278	.	+	0	lysine--tRNA ligase

## Sheet: Ab49_GEIH-2010_MSMM01000317
##sequence-region MSMM01000317.1 1 1373
##species https://www.ncbi.nlm.nih.gov/Taxonomy/Browser/wwwtax.cgi?id=470
MSMM01000317.1	Protein Homology	CDS	1	221	.	+	2	partial
MSMM01000317.1	Protein Homology	CDS	309	530	.	+	0	hypothetical protein
MSMM01000317.1	Protein Homology	CDS	615	932	.	-	0	hypothetical protein
MSMM01000317.1	Protein Homology	CDS	1038	1259	.	-	0	hypothetical protein

## Sheet: Ab49_GEIH-2010_MSMM01000323
##sequence-region MSMM01000323.1 1 14509
##species https://www.ncbi.nlm.nih.gov/Taxonomy/Browser/wwwtax.cgi?id=470
MSMM01000323.1	Protein Homology	CDS	499	1407	.	-	0	LysR family transcriptional regulator
MSMM01000323.1	Protein Homology	CDS	1414	2358	.	-	0	alpha/beta hydrolase
MSMM01000323.1	Protein Homology	CDS	2413	3594	.	-	0	FAD-dependent oxidoreductase
MSMM01000323.1	Protein Homology	CDS	3687	3851	.	-	0	rubredoxin
MSMM01000323.1	Protein Homology	CDS	4295	4732	.	+	0	ATPase
MSMM01000323.1	Protein Homology	CDS	4802	5290	.	-	0	esterase
MSMM01000323.1	Protein Homology	CDS	5547	7076	.	+	0	lysine--tRNA ligase
MSMM01000323.1	Protein Homology	CDS	7266	8708	.	+	0	hypothetical protein
MSMM01000323.1	Protein Homology	CDS	9085	9999	.	+	0	sulfate adenylyltransferase small subunit
MSMM01000323.1	Protein Homology	CDS	10030	11643	.	+	0	sulfate adenylyltransferase subunit CysN
MSMM01000323.1	Protein Homology	CDS	11696	12244	.	-	0	hypothetical protein
MSMM01000323.1	Protein Homology	CDS	12466	12978	.	+	0	hypothetical protein
MSMM01000323.1	Protein Homology	CDS	13052	14389	.	-	0	citrate transporter

## Sheet: Ab49_GEIH-2010_ MSMM01000347
##sequence-region MSMM01000347.1 1 500
##species https://www.ncbi.nlm.nih.gov/Taxonomy/Browser/wwwtax.cgi?id=470

## Sheet: Ab54_GEIH-2010_MSML01000240
##sequence-region MSML01000240.1 1 4408
##species https://www.ncbi.nlm.nih.gov/Taxonomy/Browser/wwwtax.cgi?id=470
MSML01000240.1	Protein Homology	CDS	339	503	.	+	0	rubredoxin
MSML01000240.1	Protein Homology	CDS	596	1777	.	+	0	FAD-dependent oxidoreductase
MSML01000240.1	Protein Homology	CDS	1832	2776	.	+	0	alpha/beta hydrolase
MSML01000240.1	Protein Homology	CDS	2783	3691	.	+	0	LysR family transcriptional regulator
MSML01000240.1	Protein Homology	CDS	3721	4311	.	-	0	cell division protein

## Sheet: Ab54_GEIH-2010_MSML01000469
##sequence-region MSML01000469.1 1 6384
##species https://www.ncbi.nlm.nih.gov/Taxonomy/Browser/wwwtax.cgi?id=470
MSML01000469.1	Protein Homology	CDS	1	215	.	+	2	partial
MSML01000469.1	Protein Homology	CDS	303	524	.	+	0	hypothetical protein
MSML01000469.1	Protein Homology	CDS	609	926	.	-	0	hypothetical protein
MSML01000469.1	Protein Homology	CDS	1032	1253	.	-	0	hypothetical protein
MSML01000469.1	Protein Homology	CDS	1538	2017	.	-	0	damage-inducible protein CinA
MSML01000469.1	Protein Homology	CDS	2333	3742	.	+	0	hypothetical protein
MSML01000469.1	Protein Homology	CDS	3803	5941	.	+	0	catalase HPII
MSML01000469.1	Protein Homology	CDS	5998	6384	.	-	0	BS570_13725

## Sheet: Ab54_GEIH-2010_MSML01000525
##sequence-region MSML01000525.1 1 9457
##species https://www.ncbi.nlm.nih.gov/Taxonomy/Browser/wwwtax.cgi?id=470
MSML01000525.1	Protein Homology	CDS	227	562	.	+	0	hypothetical protein
MSML01000525.1	Protein Homology	CDS	816	1295	.	+	0	SCP-2 sterol transfer family protein
MSML01000525.1	Protein Homology	CDS	1335	1778	.	-	0	D-tyrosyl-tRNA(Tyr) deacylase
MSML01000525.1	Protein Homology	CDS	1947	3161	.	+	0	nicotinate phosphoribosyltransferase
MSML01000525.1	Protein Homology	CDS	3312	4160	.	+	0	sulfurtransferase
MSML01000525.1	Protein Homology	CDS	4157	5008	.	+	0	phosphatidylserine decarboxylase
MSML01000525.1	Protein Homology	CDS	5437	6657	.	+	0	acetamidase
MSML01000525.1	Protein Homology	CDS	6788	7207	.	+	0	hypothetical protein
MSML01000525.1	Protein Homology	CDS	7278	8036	.	-	0	ABC transporter substrate-binding protein
MSML01000525.1	Protein Homology	CDS	8274	9457	.	+	0	BS570_15380

## Sheet: Ab76_GEIH-2010_MSLY01000008
##sequence-region MSLY01000008.1 1 1094
##species https://www.ncbi.nlm.nih.gov/Taxonomy/Browser/wwwtax.cgi?id=470
MSLY01000008.1	Protein Homology	CDS	30	251	.	+	0	hypothetical protein
MSLY01000008.1	Protein Homology	CDS	336	653	.	-	0	hypothetical protein
MSLY01000008.1	Protein Homology	CDS	759	980	.	-	0	hypothetical protein

## Sheet: Ab76_GEIH-2010_MSLY01000677
##sequence-region MSLY01000677.1 1 3621
##species https://www.ncbi.nlm.nih.gov/Taxonomy/Browser/wwwtax.cgi?id=470
MSLY01000677.1	Protein Homology	CDS	51	1232	.	+	0	FAD-dependent oxidoreductase
MSLY01000677.1	Protein Homology	CDS	1287	2231	.	+	0	alpha/beta hydrolase
MSLY01000677.1	Protein Homology	CDS	2238	3146	.	+	0	LysR family transcriptional regulator
MSLY01000677.1	Protein Homology	CDS	3176	3621	.	-	2	BS571_15185

[truncated: 29 more sheets: Ab76_GEIH-2010_MSLY01000708, Ab103_GEIH-2010_MSLX01000655, Ab103_GEIH-2010_MSLX01000266, Ab103_GEIH-2010_MSLX01000388, Ab104_GEIH-2010_MSMA01000019, Ab104_GEIH-2010_MSMA01000107, Ab104_GEIH-2010_MSMA01000246, Ab105_GEIH-2010_LJHB01000001, Ab105_GEIH-2010_LJHB01000010, Ab121_GEIH-2010_MSLZ01000141, Ab122_GEIH-2010_MSMD01000782, Ab155_GEIH-2000_LJHA01000001, Ab155_GEIH-2000_LJHA01000002, Ab158_GEIH-2000_MSMC01000196, Ab158_GEIH-2000_MSMC01000525, Ab166_GEIH-2000_MSMG01000383, Ab166_GEIH-2000_MSMG01001001, Ab166_GEIH-2000_MSMG01000974, Ab166_GEIH-2000_MSMG01001128, Ab169_GEIH-2000_MSMF01000039 …]
